# Supplementary material
Source: MDPI journal article supplement (https://www.mdpi.com/2073-4395/12/7/1483)
Supplement: s1 [file s1]

Supplementary Table S1. The 98 SSR and 639 SNP markers

|                   |                   |                   |
|-------------------|-------------------|-------------------|
| Sat_106           | Satt249           | Satt501           |
| Sat_133           | Satt268           | Satt502           |
| Sat_141           | Satt271           | Satt504           |
| Sat_190           | Satt282           | Satt505           |
| Sat_233           | Satt288           | Satt506           |
| Sat_244           | Satt291           | Satt507           |
| Sat_306           | Satt306           | Satt516           |
| Sat_315           | Satt308           | Satt533           |
| Satt020           | Satt313           | Satt537           |
| Satt022           | Satt314           | Satt538           |
| Satt031           | Satt335           | Satt548           |
| Satt071           | Satt338           | Satt556           |
| Satt082           | Satt346           | Satt557           |
| Satt127           | Satt350           | Satt558           |
| Satt144           | Satt365           | Satt566           |
| Satt146           | Satt387           | Satt577           |
| Satt166           | Satt389           | Satt578           |
| Satt168           | Satt390           | Satt579           |
| Satt173           | Satt411           | Satt595           |
| Satt175           | Satt419           | Satt596           |
| Satt179           | Satt427           | Satt600           |
| Satt182           | Satt431           | Satt604           |
| Satt187           | Satt432           | Satt610           |
| Satt191           | Satt442           | Satt644           |
| Satt195           | Satt446           | Satt655           |
| Satt196           | Satt451           | Satt664           |
| Satt197           | Satt453           | Satt688           |
| Satt202           | Satt457           | Satt700           |
| Satt205           | Satt477           | Satt703           |
| Satt216           | Satt482           | Sct_187           |
| Satt226           | Satt487           | Sct_189           |
| Satt230           | Satt488           | BF008905          |
| Satt236           | Satt495           |                   |
| BARC-024383-04864 | BARC-021831-04219 | BARC-044037-08588 |
| BARC-014287-01306 | BARC-027618-06622 | BARC-016539-02087 |
| BARC-021573-04148 | BARC-026091-05255 | BARC-025873-05130 |
| BARC-017329-02265 | BARC-043119-08535 | BARC-031375-07086 |
| BARC-042331-08243 | BARC-045081-08872 | BARC-031547-07108 |
| BARC-013665-01226 | BARC-013587-01169 | BARC-021617-04156 |
| BARC-020401-04601 | BARC-014665-01613 | BARC-016279-02316 |
| BARC-026129-05274 | BARC-016119-02287 | BARC-040309-07711 |
| BARC-025997-05216 | BARC-028513-05926 | BARC-041167-07925 |

|                   |                   |                   |
|-------------------|-------------------|-------------------|
| BARC-019085-03298 | BARC-027410-06562 | BARC-027720-06642 |
| BARC-031957-07230 | BARC-022445-04327 | BARC-027874-06697 |
| BARC-029213-06124 | BARC-025719-05018 | BARC-021199-04005 |
| BARC-020035-04416 | BARC-014453-01374 | BARC-025703-04999 |
| BARC-042601-08311 | BARC-021577-04150 | BARC-014457-01378 |
| BARC-014639-01604 | BARC-027788-06671 | BARC-014285-01304 |
| BARC-019061-03295 | BARC-013213-00450 | BARC-030905-06965 |
| BARC-028171-05783 | BARC-039223-07478 | BARC-028553-05949 |
| BARC-028407-05864 | BARC-014847-01910 | BARC-028893-06035 |
| BARC-020259-04536 | BARC-014837-01682 | BARC-016567-02143 |
| BARC-027778-06658 | BARC-028775-06010 | BARC-020561-04671 |
| BARC-027546-06606 | BARC-030625-06913 | BARC-021353-04043 |
| BARC-029873-06450 | BARC-043095-08525 | BARC-044973-08855 |
| BARC-018933-03040 | BARC-018147-02532 | BARC-016505-02073 |
| BARC-030735-06928 | BARC-026019-05227 | BARC-030967-06981 |
| BARC-018681-02991 | BARC-015095-02564 | BARC-020455-04627 |
| BARC-044895-08836 | BARC-041903-08129 | BARC-014309-01312 |
| BARC-024333-04850 | BARC-017811-02392 | BARC-013927-01275 |
| BARC-029787-06362 | BARC-018025-02500 | BARC-017083-02193 |
| BARC-021937-04237 | BARC-030403-06863 | BARC-013273-00466 |
| BARC-031701-07215 | BARC-017915-02450 | BARC-014919-01921 |
| BARC-028679-05986 | BARC-018583-02981 | BARC-039667-07534 |
| BARC-013537-01155 | BARC-018713-03241 | BARC-024363-04860 |
| BARC-037229-06749 | BARC-015917-02015 | BARC-018619-02983 |
| BARC-039593-07509 | BARC-042439-08267 | BARC-017211-02251 |
| BARC-028361-05840 | BARC-018099-02516 | BARC-024501-04947 |
| BARC-040339-07714 | BARC-026093-05256 | BARC-030661-06918 |
| BARC-018419-02911 | BARC-017097-02199 | BARC-013859-01259 |
| BARC-021329-04038 | BARC-030313-06852 | BARC-040761-07845 |
| BARC-018023-02499 | BARC-015313-02278 | BARC-031363-07063 |
| BARC-028309-05824 | BARC-024219-04806 | BARC-029687-06322 |
| BARC-030485-06876 | BARC-027378-06560 | BARC-030849-06952 |
| BARC-039561-07508 | BARC-024049-04718 | BARC-018657-02988 |
| BARC-028321-05831 | BARC-014949-01931 | BARC-021531-04135 |
| BARC-030305-06851 | BARC-027846-06691 | BARC-014589-01587 |
| BARC-016117-02283 | BARC-027688-06630 | BARC-039805-07589 |
| BARC-029605-06243 | BARC-044639-08743 | BARC-030807-06945 |
| BARC-044617-08741 | BARC-024221-04807 | BARC-018835-03260 |
| BARC-024297-04834 | BARC-014321-01317 | BARC-044951-08843 |
| BARC-030255-06839 | BARC-018663-03235 | BARC-042795-08412 |
| BARC-014277-01301 | BARC-014557-01578 | BARC-029753-06334 |
| BARC-025861-05129 | BARC-028177-05786 | BARC-025791-05069 |
| BARC-030765-06943 | BARC-013837-01253 | BARC-013995-01298 |

|                   |                   |                   |
|-------------------|-------------------|-------------------|
| BARC-029425-06191 | BARC-014305-01310 | BARC-040621-07802 |
| BARC-024117-04765 | BARC-040023-07635 | BARC-030743-06936 |
| BARC-042801-08413 | BARC-020031-04407 | BARC-027478-06590 |
| BARC-030429-06866 | BARC-025707-05009 | BARC-020103-04463 |
| BARC-015529-01991 | BARC-025705-05001 | BARC-020105-04465 |
| BARC-040669-07814 | BARC-014491-01561 | BARC-028749-06006 |
| BARC-031733-07217 | BARC-012991-00416 | BARC-032525-08992 |
| BARC-044709-08764 | BARC-020405-04602 | BARC-020481-04638 |
| BARC-019015-03051 | BARC-014947-01929 | BARC-016063-02049 |
| BARC-022437-04324 | BARC-042161-08194 | BARC-016573-02144 |
| BARC-014361-01331 | BARC-040475-07751 | BARC-040713-07825 |
| BARC-016977-02171 | BARC-039437-07498 | BARC-025955-05182 |
| BARC-030073-06797 | BARC-021425-04104 | BARC-025183-06457 |
| BARC-031795-07219 | BARC-038885-07387 | BARC-030679-06925 |
| BARC-041405-07979 | BARC-018915-03279 | BARC-018819-03259 |
| BARC-017023-02178 | BARC-042947-08472 | BARC-018781-03247 |
| BARC-040731-07826 | BARC-016003-02032 | BARC-027390-06561 |
| BARC-041363-07971 | BARC-016475-02620 | BARC-016507-02078 |
| BARC-042719-08393 | BARC-024477-04899 | BARC-014923-01922 |
| BARC-025891-05142 | BARC-040201-07680 | BARC-017255-02254 |
| BARC-017089-02194 | BARC-017963-02483 | BARC-018115-02528 |
| BARC-020509-04645 | BARC-031705-07216 | BARC-021561-04146 |
| BARC-044523-08716 | BARC-017909-02439 | BARC-032025-07239 |
| BARC-021803-04215 | BARC-015055-02546 | BARC-041581-08046 |
| BARC-017645-02637 | BARC-016811-02338 | BARC-013983-01297 |
| BARC-030647-06914 | BARC-039815-07590 | BARC-026065-05239 |
| BARC-044607-08736 | BARC-044221-08647 | BARC-027908-06698 |
| BARC-014527-01571 | BARC-025745-05031 | BARC-025631-06538 |
| BARC-015973-02029 | BARC-041325-07964 | BARC-014429-01363 |
| BARC-024137-04780 | BARC-020113-04470 | BARC-013295-00467 |
| BARC-016957-02165 | BARC-025503-06514 | BARC-014389-01344 |
| BARC-018563-02977 | BARC-029049-06055 | BARC-014483-01560 |
| BARC-029521-06208 | BARC-025493-06513 | BARC-044797-08809 |
| BARC-030219-06833 | BARC-018923-03037 | BARC-045205-08910 |
| BARC-029689-06324 | BARC-030951-06979 | BARC-025897-05144 |
| BARC-021477-04129 | BARC-039433-07497 | BARC-031461-07098 |
| BARC-024287-04825 | BARC-024481-04933 | BARC-022043-04271 |
| BARC-014619-01595 | BARC-014271-01299 | BARC-029823-06424 |
| BARC-030909-06972 | BARC-027534-06600 | BARC-030853-06954 |
| BARC-024261-04822 | BARC-025753-05037 | BARC-014579-01586 |
| BARC-015479-01984 | BARC-029771-06336 | BARC-018521-02929 |
| BARC-016523-02083 | BARC-027480-06591 | BARC-015435-01966 |
| BARC-017911-02445 | BARC-028607-05972 | BARC-030359-06858 |

|                   |                   |                   |
|-------------------|-------------------|-------------------|
| BARC-018791-03019 | BARC-017755-03125 | BARC-027502-06598 |
| BARC-025461-06505 | BARC-014987-01944 | BARC-032717-09021 |
| BARC-029195-06120 | BARC-016029-02040 | BARC-031493-07101 |
| BARC-044417-08704 | BARC-030079-06803 | BARC-039135-07450 |
| BARC-018645-03217 | BARC-014329-01322 | BARC-041649-08055 |
| BARC-028485-05923 | BARC-019069-03297 | BARC-024045-04713 |
| BARC-021191-04000 | BARC-024299-04840 | BARC-013257-00462 |
| BARC-022037-04263 | BARC-013055-00431 | BARC-018007-02494 |
| BARC-040963-07870 | BARC-044107-08620 | BARC-028583-05961 |
| BARC-024449-04894 | BARC-040185-07678 | BARC-014349-01327 |
| BARC-029665-06288 | BARC-016649-02159 | BARC-018177-02535 |
| BARC-025885-05137 | BARC-040985-07872 | BARC-025561-06521 |
| BARC-017191-02247 | BARC-028805-06018 | BARC-014657-01608 |
| BARC-013637-01193 | BARC-028221-05799 | BARC-027622-06625 |
| BARC-017059-02189 | BARC-040965-07871 | BARC-028887-06034 |
| BARC-032251-08930 | BARC-042937-08466 | BARC-041127-07909 |
| BARC-041779-08090 | BARC-016131-02290 | BARC-026113-05263 |
| BARC-030167-06816 | BARC-029179-06104 | BARC-018741-03001 |
| BARC-030169-06817 | BARC-025839-05112 | BARC-028899-06037 |
| BARC-020147-04482 | BARC-014957-01937 | BARC-020027-04405 |
| BARC-030579-06905 | BARC-018551-02971 | BARC-018387-03171 |
| BARC-013653-01222 | BARC-043173-08548 | BARC-022431-04323 |
| BARC-013709-01241 | BARC-018487-03198 | BARC-028719-05996 |
| BARC-029859-06448 | BARC-039061-07429 | BARC-018013-02496 |
| BARC-014747-01639 | BARC-014535-01572 | BARC-014381-01340 |
| BARC-029279-06138 | BARC-029625-06252 | BARC-040479-07752 |
| BARC-031269-07029 | BARC-043267-08567 | BARC-027482-06592 |
| BARC-014323-01320 | BARC-037177-06728 | BARC-027452-06569 |
| BARC-018959-03045 | BARC-016463-02617 | BARC-030893-06961 |
| BARC-039153-07459 | BARC-025291-06469 | BARC-015067-02555 |
| BARC-042629-08331 | BARC-031169-07006 | BARC-013237-00459 |
| BARC-022039-04270 | BARC-018095-02514 | BARC-021979-04242 |
| BARC-041147-07917 | BARC-026145-05280 | BARC-028599-05966 |
| BARC-042201-08212 | BARC-015079-02561 | BARC-041455-07988 |
| BARC-021257-04015 | BARC-039237-07479 | BARC-018093-02513 |
| BARC-020139-04480 | BARC-027816-06683 | BARC-020505-04644 |
| BARC-039993-07626 | BARC-025709-05013 | BARC-022453-04332 |
| BARC-021337-04040 | BARC-028335-05833 | BARC-018661-03231 |
| BARC-029457-06193 | BARC-027552-06609 | BARC-014467-01559 |
| BARC-013627-01181 | BARC-021343-04041 | BARC-031195-07010 |
| BARC-040163-07662 | BARC-024577-05301 | BARC-028307-05823 |
| BARC-021407-04097 | BARC-029827-06444 | BARC-031951-07227 |
| BARC-024489-04936 | BARC-040489-07755 | BARC-041381-07975 |

|                   |                   |                   |
|-------------------|-------------------|-------------------|
| BARC-017185-02246 | BARC-041129-07912 | BARC-044047-08593 |
| BARC-015471-01977 | BARC-039921-07607 | BARC-022261-04297 |
| BARC-017681-03105 | BARC-039067-07437 | BARC-019807-04396 |
| BARC-026013-05225 | BARC-029461-06196 | BARC-025801-05075 |
| BARC-015063-02553 | BARC-025913-05155 | BARC-038949-07404 |
| BARC-016503-02070 | BARC-020171-04491 | BARC-018761-03242 |
| BARC-013509-00507 | BARC-017311-02261 | BARC-031917-07226 |
| BARC-044741-08783 | BARC-016541-02090 | BARC-043081-08519 |
| BARC-031121-06998 | BARC-038869-07359 | BARC-022321-04314 |
| BARC-013647-01216 | BARC-025847-05113 | BARC-022077-04282 |
| BARC-014379-01337 | BARC-030259-06840 | BARC-042895-08450 |
| BARC-039099-07444 | BARC-039753-07565 | BARC-041267-07957 |
| BARC-021603-04153 | BARC-014741-01637 | BARC-043111-08534 |
| BARC-017669-03102 | BARC-044361-08677 | BARC-017835-02393 |
| BARC-013305-00475 | BARC-027542-06603 | BARC-039625-07523 |
| BARC-016635-02155 | BARC-029301-06148 | BARC-042131-08182 |
| BARC-013475-00496 | BARC-040505-07757 | BARC-042413-08254 |
| BARC-016413-02582 | BARC-025969-05190 | BARC-030433-06867 |
| BARC-020589-04684 | BARC-031459-07097 | BARC-025851-05118 |
| BARC-043061-08513 | BARC-029707-06329 | BARC-021875-04228 |
| BARC-017095-02197 | BARC-028649-05981 | BARC-024229-04809 |
| BARC-016807-02333 | BARC-021793-04213 | BARC-040611-07798 |
| BARC-019775-04370 | BARC-013645-01207 | BARC-029845-06447 |
| BARC-032147-07327 | BARC-028901-06041 | BARC-013233-00452 |
| BARC-018577-02980 | BARC-013639-01202 | BARC-016397-02579 |
| BARC-018973-03046 | BARC-016069-02054 | BARC-028555-05950 |
| BARC-029055-06058 | BARC-013651-01219 | BARC-022201-04296 |
| BARC-014455-01377 | BARC-021153-03996 | BARC-044011-08582 |
| BARC-044073-08599 | BARC-018981-03289 | BARC-014341-01326 |
| BARC-021753-04197 | BARC-021641-04161 | BARC-026035-05230 |
| BARC-017975-02490 | BARC-025277-06467 | BARC-043033-08505 |
| BARC-044357-08676 | BARC-042521-08287 | BARC-042003-08158 |
| BARC-022165-04291 | BARC-019039-03054 | BARC-018101-02517 |
| BARC-013063-00436 | BARC-014385-01342 | BARC-029189-06116 |
| BARC-014761-01655 | BARC-027718-06640 | BARC-029811-06423 |
| BARC-042823-08429 | BARC-044075-08603 | BARC-017045-02182 |
| BARC-029275-06136 | BARC-029825-06443 | BARC-042707-08378 |
| BARC-041483-08020 | BARC-025961-05189 | BARC-018019-02497 |
| BARC-045249-08914 | BARC-031399-07088 | BARC-029531-06209 |
| BARC-029583-06223 | BARC-013845-01256 | BARC-029491-06203 |
| BARC-014813-01678 | BARC-022289-04309 | BARC-042373-08248 |
| BARC-044609-08738 | BARC-039195-07466 | BARC-024413-04876 |
| BARC-041421-07980 | BARC-014705-01623 | BARC-031677-07213 |

|                   |                   |                   |
|-------------------|-------------------|-------------------|
| BARC-027950-06706 | BARC-012945-00406 | BARC-041383-07976 |
| BARC-030457-06870 | BARC-016783-02329 | BARC-021715-04191 |
| BARC-030181-06822 | BARC-032007-07237 | BARC-017661-02662 |
| BARC-025669-04989 | BARC-017117-02204 | BARC-039211-07470 |
| BARC-029735-06331 | BARC-027486-06594 | BARC-040575-07784 |
| BARC-030025-06778 | BARC-020517-04647 | BARC-018693-02992 |
| BARC-028861-06032 | BARC-024253-04817 | BARC-030491-06877 |
| BARC-021581-04152 | BARC-032201-07331 | BARC-041935-08142 |
| BARC-018515-02927 | BARC-028645-05979 | BARC-031993-07234 |
| BARC-015535-01992 | BARC-031833-07221 | BARC-017339-02269 |
| BARC-018885-03267 | BARC-044085-08610 | CG4P1-221         |
| BARC-020457-04632 | BARC-026133-05276 | cry2-2            |
| BARC-013203-00448 | BARC-016467-02618 | cry2-3            |
| BARC-022029-04261 | BARC-013561-01160 | cry2-4            |
| BARC-031583-07115 | BARC-017957-02480 | G                 |
| BARC-016181-02302 | BARC-021465-04116 | GmBd28K           |
| BARC-030291-06848 | BARC-014821-01680 | GmHs1pro-176      |
| BARC-044415-08701 | BARC-016485-02069 | OPN11             |
| BARC-044913-08838 | BARC-028205-05792 | QS08006           |
| BARC-013061-00434 | BARC-029185-06106 | QS08007           |
| BARC-013835-01248 | BARC-028709-05992 | QS080128          |
| BARC-024345-04854 | BARC-029415-06172 | QS080132-1        |
| BARC-029975-06765 | BARC-018809-03022 | QS080163          |
| BARC-013007-00419 | BARC-020101-04452 | rhg1-2555-2564    |
| BARC-016145-02292 | BARC-016627-02152 | rhg1-2859-2868    |
| BARC-021733-04193 | BARC-029997-06773 | rhg1-597-606      |
| BARC-040521-07773 | BARC-041953-08144 | rhg1-680-689      |
| BARC-014655-01607 | BARC-029355-06159 | rhg1-748-757      |
| BARC-028787-06014 | BARC-027930-06703 | Rhg4-224-1500     |
| BARC-021321-04035 | BARC-031999-07236 | Rhg4-620-1500     |
| BARC-018175-02533 | BARC-016535-02085 | Rhg4-887-1500     |
| BARC-021827-04218 | BARC-018125-02530 | TS                |
