# Supplementary material
Source: MDPI journal article supplement (https://www.mdpi.com/2073-4395/12/7/1483)
Supplement: s1 [file s1]

Supplementary Table S2. Plant height and stem diameter related parameters of the 185 accessions

| ID       | PHN (cm)     | PHW (cm)     | PHCR | SDN (mm)   | SDW(mm)   | SDCR |
|----------|--------------|--------------|------|------------|-----------|------|
| 11HX-001 | 54.50±2.51   | NA           | NA   | 8.52±0.08  | NA        | NA   |
| 11HX-002 | 122.33±24.85 | 173.33±9.74  | 0.42 | 12.43±4.44 | 7.95±1.29 | 0.36 |
| 11HX-004 | 97.67±13.02  | 140.00±14.14 | 0.43 | 11.18±1.76 | 8.04±1.40 | 0.28 |
| 11HX-005 | 52.33±2.62   | 73.00±7.02   | 0.39 | 7.01±0.70  | 6.52±1.28 | 0.07 |
| 11HX-006 | 80.67±6.85   | 92.67±4.78   | 0.15 | 7.01±0.54  | 5.31±1.08 | 0.24 |
| 11HX-007 | 140.33±13.34 | 135.01±9.96  | 0.04 | 10.07±1.06 | 7.21±0.61 | 0.28 |
| 11HX-008 | 63.33±5.73   | 69.50±2.50   | 0.10 | 6.46±0.34  | 5.34±0.54 | 0.17 |
| 11HX-009 | 81.67±9.03   | 101.00±17.15 | 0.24 | 8.12±0.86  | 7.47±1.22 | 0.08 |
| 11HX-010 | 69.33±2.49   | 82.33±2.62   | 0.19 | 9.64±1.00  | 7.11±0.73 | 0.26 |
| 11HX-011 | 109.00±9.42  | 112.00±20.83 | 0.03 | 8.47±0.72  | 7.07±0.72 | 0.17 |
| 11HX-012 | 76.67±3.09   | 139.33±45.38 | 0.82 | 6.94±0.93  | 6.22±0.82 | 0.10 |
| 11HX-013 | 90.67±0.94   | 106.33±15.15 | 0.17 | 7.28±0.72  | 5.95±0.65 | 0.18 |
| 11HX-015 | 73.33±7.04   | 105.00±25.00 | 0.43 | 7.44±0.94  | 5.02±0.35 | 0.33 |
| 11HX-016 | 89.33±6.86   | NA           | NA   | 7.95±0.92  | NA        | NA   |
| 11HX-018 | 78.00±4.97   | 94.33±2.05   | 0.21 | 6.77±0.44  | 5.89±0.71 | 0.13 |
| 11HX-019 | 80.00±5.72   | 81.67±17.82  | 0.02 | 7.45±2.56  | 6.16±0.54 | 0.17 |
| 11HX-020 | 54.50±7.50   | 55.00±3.27   | 0.01 | 8.37±0.91  | 6.28±0.11 | 0.25 |
| 11HX-021 | 66.00±0.00   | 84.33±1.89   | 0.28 | 8.10±0.55  | 4.81±0.00 | 0.41 |
| 11HX-022 | 85.00±14.24  | 89.25±3.96   | 0.05 | 9.11±0.88  | 5.79±0.85 | 0.36 |
| 11HX-023 | 54.50±3.35   | 67.00±0.00   | 0.23 | 7.70±0.70  | 7.05±0.00 | 0.08 |
| 11HX-025 | 63.00±2.16   | 89.33±11.44  | 0.42 | 7.11±1.19  | 7.06±0.61 | 0.01 |
| 11HX-026 | 73.33±3.77   | 80.33±8.65   | 0.10 | 6.73±1.25  | 5.53±0.99 | 0.18 |
| 11HX-029 | 61.50±10.06  | 89.67±4.50   | 0.46 | 6.65±0.53  | 6.54±0.49 | 0.02 |
| 11HX-030 | 83.50±15.14  | 122.00±29.80 | 0.46 | 8.01±0.61  | 6.20±0.78 | 0.23 |
| 11HX-031 | 74.00±2.83   | 101.33±12.28 | 0.37 | 8.14±0.41  | 5.81±0.67 | 0.29 |
| 11HX-032 | 80.50±8.02   | 114.00±16.88 | 0.42 | 7.26±0.70  | 6.10±1.08 | 0.16 |
| 11HX-033 | 43.00±5.83   | 50.50±3.50   | 0.17 | 6.66±0.86  | 5.58±0.39 | 0.16 |
| 11HX-034 | 77.00±2.94   | 118.67±14.38 | 0.54 | 9.22±1.39  | 7.42±1.29 | 0.20 |
| 11HX-035 | 94.00±4.90   | 122.67±16.05 | 0.31 | 8.45±1.95  | 5.84±1.40 | 0.31 |
| 11HX-036 | 74.33±2.49   | 88.33±18.06  | 0.19 | 8.18±1.38  | 6.02±1.15 | 0.26 |
| 11HX-037 | 88.00±4.32   | 109.33±7.59  | 0.24 | 6.89±0.70  | 6.59±0.51 | 0.04 |
| 11HX-038 | 84.00±2.00   | 105.00±11.00 | 0.25 | 9.71±0.73  | 8.67±2.08 | 0.11 |
| 11HX-039 | 66.75±6.42   | 85.00±20.00  | 0.27 | 8.19±1.47  | 7.92±1.16 | 0.03 |
| 11HX-040 | 70.00±3.94   | 93.00±7.00   | 0.33 | 7.40±2.08  | 5.91±0.03 | 0.20 |
| 11HX-041 | 92.33±11.59  | 103.33±2.05  | 0.12 | 7.81±0.77  | 7.12±0.60 | 0.09 |
| 11HX-042 | 80.00±7.26   | 97.00±3.27   | 0.21 | 7.13±0.57  | 5.21±0.11 | 0.27 |
| 11HX-043 | 65.00±1.63   | 74.33±2.49   | 0.14 | 8.09±0.89  | 5.55±0.54 | 0.31 |
| 11HX-044 | 74.50±20.07  | 79.67±2.49   | 0.07 | 8.37±1.17  | 5.63±1.16 | 0.33 |
| 11HX-046 | 68.67±3.30   | NA           | NA   | 6.77±0.83  | NA        | NA   |

|          |              |              |      |            |           |       |
|----------|--------------|--------------|------|------------|-----------|-------|
| 11HX-047 | 71.67±3.09   | 81.00±18.21  | 0.13 | 6.40±1.15  | 5.90±0.97 | 0.08  |
| 11HX-048 | 94.33±11.09  | 97.50±5.50   | 0.03 | 9.89±0.36  | 7.09±0.93 | 0.28  |
| 11HX-051 | 98.67±3.30   | 116.75±22.09 | 0.18 | 7.20±0.81  | 5.57±0.79 | 0.23  |
| 11HX-052 | 75.33±2.87   | 112.00±5.89  | 0.49 | 6.37±0.34  | 4.71±1.54 | 0.26  |
| 11HX-053 | 70.67±0.94   | 86.50±18.03  | 0.22 | 6.42±1.18  | 5.15±0.38 | 0.20  |
| 11HX-054 | 82.33±14.06  | 101.75±22.9  | 0.24 | 8.29±0.40  | 6.12±0.76 | 0.26  |
| 11HX-055 | 70.33±5.91   | 80.33±3.68   | 0.14 | 6.51±1.14  | 6.27±0.30 | 0.04  |
| 11HX-056 | 53.67±9.57   | 105.25±8.07  | 0.96 | 7.29±0.34  | 6.10±0.62 | 0.16  |
| 11HX-057 | 100.00±11.70 | 113.50±22.51 | 0.14 | 6.50±0.71  | 4.07±0.23 | 0.37  |
| 11HX-061 | 101.25±16.25 | 115.67±16.86 | 0.14 | 10.76±3.06 | 5.54±0.84 | 0.49  |
| 11HX-062 | 95.00±7.35   | 118.67±3.86  | 0.25 | 7.40±1.15  | 7.55±1.22 | -0.02 |
| 11HX-063 | 108.67±2.62  | 124.67±16.86 | 0.15 | 7.09±0.18  | 6.72±0.97 | 0.06  |
| 11HX-067 | 109.00±14.17 | 110.00±5.10  | 0.01 | 9.34±1.34  | 8.02±0.87 | 0.14  |
| 11HX-068 | 86.67±9.46   | 121.00±25.47 | 0.40 | 8.71±0.94  | 8.11±0.42 | 0.07  |
| 11HX-069 | 62.67±2.62   | 77.00±13.14  | 0.23 | 9.12±0.61  | 7.31±0.67 | 0.20  |
| 11HX-071 | 76.75±11.43  | NA           | NA   | 9.17±1.76  | NA        | NA    |
| 11HX-072 | 63.00±2.94   | 89.00±18.46  | 0.41 | 6.79±0.96  | 6.52±0.79 | 0.04  |
| 11HX-074 | 85.00±1.41   | 94.33±1.25   | 0.11 | 8.80±0.28  | 7.96±1.27 | 0.10  |
| 11HX-075 | 92.33±1.25   | 122.33±11.56 | 0.32 | 6.46±0.66  | 6.05±1.21 | 0.06  |
| 11HX-076 | 107.67±2.62  | 141.67±16.50 | 0.32 | 8.38±0.36  | 7.24±0.57 | 0.14  |
| 11HX-077 | 91.50±4.03   | 130.75±9.36  | 0.43 | 5.41±0.36  | 5.38±0.72 | 0.01  |
| 11HX-078 | 105.5±11.41  | 132.50±32.73 | 0.26 | 6.79±0.66  | 6.27±0.43 | 0.08  |
| 11HX-079 | 79.00±4.97   | 88.00±11.60  | 0.11 | 6.47±0.19  | 6.27±0.72 | 0.03  |
| 11HX-080 | 81.75±3.56   | 110.67±27.86 | 0.35 | 5.02±0.65  | 4.95±0.25 | 0.01  |
| 11HX-081 | 71.75±3.90   | NA           | NA   | 5.67±0.40  | NA        | NA    |
| 11HX-082 | 94.67±11.15  | 114.33±22.13 | 0.21 | 8.43±0.60  | 7.26±1.27 | 0.14  |
| 11HX-083 | 109.33±8.50  | 133.00±37.21 | 0.22 | 11.49±0.67 | 8.24±1.34 | 0.28  |
| 11HX-085 | 60.33±11.61  | 89.00±11.05  | 0.48 | 6.79±0.99  | 5.35±0.08 | 0.27  |
| 11HX-086 | 118.67±2.62  | 125.00±24.83 | 0.05 | 8.34±0.70  | 6.87±1.59 | 0.18  |
| 11HX-087 | 106.33±13.70 | 116.67±10.40 | 0.10 | 10.22±1.29 | 9.05±0.87 | 0.11  |
| 11HX-088 | 135.67±32.56 | 141.00±18.49 | 0.04 | 9.11±1.50  | 7.97±0.73 | 0.13  |
| 11HX-090 | 84.50±1.80   | 112.00±19.51 | 0.33 | 5.81±0.63  | 5.55±0.42 | 0.04  |
| 11HX-091 | 93.25±13.10  | 144.25±11.71 | 0.55 | 7.02±0.76  | 5.05±0.27 | 0.28  |
| 11HX-093 | 77.75±2.77   | 94.00±19.25  | 0.21 | 6.85±0.39  | 5.16±0.33 | 0.25  |
| 11HX-096 | 68.25±9.20   | 71.50±6.50   | 0.05 | 6.78±0.80  | 5.12±0.15 | 0.24  |
| 11HX-097 | 92.23±11.36  | NA           | NA   | 7.11±0.56  | NA        | NA    |
| 11HX-100 | 71.25±5.40   | 85.75±11.10  | 0.20 | 8.49±1.13  | 6.64±0.93 | 0.22  |
| 11HX-101 | 87.00±7.87   | 94.00±4.74   | 0.08 | 8.51±0.71  | 6.20±1.15 | 0.27  |
| 11HX-102 | 62.75±4.92   | 103.67±22.88 | 0.65 | 6.53±0.36  | 6.30±0.87 | 0.04  |
| 11HX-105 | 63.00±5.87   | 111.67±6.24  | 0.77 | 6.33±0.77  | 4.20±0.95 | 0.34  |
| 11HX-106 | 93.00±8.04   | 99.00±5.66   | 0.06 | 6.15±0.71  | 5.09±0.58 | 0.17  |
| 11HX-107 | 52.67±6.18   | 72.33±3.68   | 0.37 | 7.59±1.02  | 5.34±0.87 | 0.30  |
| 11HX-108 | 96.33±14.70  | 110.33±7.76  | 0.15 | 5.46±0.21  | 5.12±0.27 | 0.06  |
| 11HX-109 | 41.00±0.00   | 46.00±5.10   | 0.12 | 6.68±0.70  | 5.25±0.00 | 0.21  |

|          |              |              |       |            |           |      |
|----------|--------------|--------------|-------|------------|-----------|------|
| 11HX-110 | 78.33±10.21  | 102.67±9.39  | 0.31  | 7.44±0.68  | 6.58±0.23 | 0.12 |
| 11HX-111 | 55.33±6.02   | 84.00±4.24   | 0.52  | 7.22±0.22  | 5.90±0.46 | 0.18 |
| 11HX-112 | 60.00±8.64   | NA           | NA    | 6.07±0.86  | NA        | NA   |
| 11HX-114 | 52.67±5.44   | 60.33±3.09   | 0.15  | 7.21±0.81  | 5.95±1.48 | 0.17 |
| 11HX-115 | 71.67±4.64   | 96.00±7.07   | 0.34  | 6.47±0.53  | 5.03±0.72 | 0.22 |
| 11HX-116 | 69.00±0.82   | 79.67±2.05   | 0.15  | 6.23±0.39  | 4.89±0.70 | 0.22 |
| 11HX-118 | 74.00±10.20  | 106.00±7.79  | 0.43  | 7.03±0.78  | 5.78±1.22 | 0.18 |
| 11HX-120 | 72.33±15.33  | 101.67±10.66 | 0.41  | 6.33±0.05  | 5.49±0.45 | 0.13 |
| 11HX-121 | 100.67±4.78  | 120.67±11.90 | 0.20  | 9.11±0.92  | 6.87±1.07 | 0.25 |
| 11HX-122 | 59.33±1.25   | 112.00±2.16  | 0.89  | 7.27±0.76  | 6.53±1.08 | 0.10 |
| 11HX-123 | 52.00±7.18   | 62.50±0.50   | 0.20  | 6.98±0.76  | 6.37±0.35 | 0.09 |
| 11HX-124 | 78.67±9.98   | 82.67±12.36  | 0.05  | 6.15±1.54  | 5.85±0.62 | 0.05 |
| 11HX-125 | 64.33±2.49   | 81.67±1.25   | 0.27  | 7.47±0.41  | 5.80±0.46 | 0.22 |
| 11HX-127 | 64.00±2.94   | 74.33±1.25   | 0.16  | 7.15±2.16  | 7.02±0.35 | 0.02 |
| 11HX-128 | 71.50±15.50  | 79.33±6.65   | 0.11  | 6.27±1.34  | 4.88±0.94 | 0.22 |
| 11HX-129 | 65.67±6.65   | 65.50±15.50  | 0.00  | 7.11±0.49  | 5.71±1.31 | 0.20 |
| 11HX-130 | 90.00±9.20   | 106.33±11.56 | 0.18  | 9.97±1.87  | 5.56±0.49 | 0.44 |
| 11HX-131 | 79.67±3.40   | 95.67±3.30   | 0.20  | 7.15±0.56  | 5.99±0.59 | 0.16 |
| 11HX-132 | 96.00±7.79   | 112.00±7.48  | 0.17  | 7.11±0.75  | 6.15±1.08 | 0.14 |
| 11HX-133 | 83.00±4.32   | 96.33±4.92   | 0.16  | 8.52±0.55  | 4.76±0.22 | 0.44 |
| 11HX-134 | 125.00±3.74  | 128.33±15.46 | 0.03  | 8.75±1.16  | 5.52±0.46 | 0.37 |
| 11HX-135 | 68.03±54.66  | 103.00±7.58  | 0.51  | 6.96±0.60  | 6.43±0.34 | 0.08 |
| 11HX-136 | 93.33±20.55  | 109.75±14.60 | 0.18  | 7.93±0.90  | 6.19±1.48 | 0.22 |
| 11HX-137 | 83.33±19.48  | 100.67±10.34 | 0.21  | 9.18±1.62  | 8.59±0.83 | 0.06 |
| 11HX-138 | 82.27±1.70   | 94.67±9.53   | 0.15  | 8.00±1.25  | 7.02±0.20 | 0.12 |
| 11HX-139 | 83.61±1.89   | 95.00±9.27   | 0.14  | 7.89±1.11  | 7.07±0.90 | 0.10 |
| 11HX-142 | 75.67±1.25   | 79.38±10.63  | 0.05  | 7.64±0.72  | 6.73±0.45 | 0.12 |
| 11HX-143 | NA           | 84.00±44.32  | NA    | NA         | 7.72±1.10 | NA   |
| 11HX-144 | 116.00±16.39 | 139.00±48.46 | 0.20  | 7.71±0.96  | 5.53±0.76 | 0.28 |
| 11HX-145 | 134.33±13.77 | 139.00±22.38 | 0.03  | 9.56±0.79  | 8.71±0.68 | 0.09 |
| 11HX-147 | 41.67±10.34  | NA           | NA    | 8.21±1.81  | NA        | NA   |
| 11HX-148 | 70.00±2.45   | 72.33±14.38  | 0.03  | 8.43±0.36  | 6.20±1.23 | 0.26 |
| 11HX-149 | 63.00±6.48   | 93.33±20.04  | 0.48  | 8.12±0.69  | 5.39±0.52 | 0.34 |
| 11HX-150 | 120.00±28.39 | 129.67±1.89  | 0.08  | 9.18±0.09  | 8.22±0.54 | 0.10 |
| 11HX-151 | 74.67±9.74   | 65.67±4.50   | -0.12 | 7.38±0.54  | 5.20±0.20 | 0.30 |
| 11HX-152 | 56.00±1.63   | 71.67±0.94   | 0.28  | 7.56±1.37  | 6.81±0.89 | 0.10 |
| 11HX-153 | 137.33±6.13  | 137.67±30.27 | 0.00  | 11.77±1.37 | 6.23±0.97 | 0.47 |
| 11HX-155 | 119.00±25.73 | 204.00±2.94  | 0.71  | 9.18±1.70  | 7.23±0.83 | 0.21 |
| 11HX-156 | 143.67±7.85  | 192.33±45.83 | 0.34  | 9.38±0.29  | 5.97±0.78 | 0.36 |
| 11HX-159 | 75.50±38.53  | 110.75±6.22  | 0.47  | 7.48±0.99  | 7.20±0.90 | 0.04 |
| 11HX-160 | 71.25±15.75  | 75.00±3.74   | 0.05  | 6.74±0.43  | 5.16±0.35 | 0.23 |
| 11HX-161 | 78.50±2.96   | 102.67±19.94 | 0.31  | 8.53±1.12  | 4.77±0.40 | 0.44 |
| 11HX-164 | 82.33±4.64   | 83.00±10.61  | 0.01  | 9.83±0.65  | 7.61±2.05 | 0.23 |
| 11HX-165 | 49.00±4.97   | 97.67±3.09   | 0.99  | 6.51±1.02  | 5.64±1.39 | 0.13 |

|          |              |              |      |            |           |       |
|----------|--------------|--------------|------|------------|-----------|-------|
| 11HX-166 | 54.00±2.16   | 60.67±10.08  | 0.12 | 6.38±0.61  | 6.31±0.45 | 0.01  |
| 11HX-167 | 64.33±8.81   | 71.00±0.82   | 0.10 | 5.11±0.74  | 4.27±0.48 | 0.16  |
| 11HX-168 | 115.00±16.57 | 160.33±1.25  | 0.39 | 9.13±0.13  | 8.88±0.97 | 0.03  |
| 11HX-170 | 120.33±4.11  | 193.33±18.41 | 0.61 | 11.15±2.38 | 7.41±1.31 | 0.34  |
| 11HX-171 | 50.25±4.38   | 81.75±3.96   | 0.63 | 6.51±0.35  | 5.45±0.37 | 0.16  |
| 11HX-172 | 99.33±4.50   | 112.33±2.49  | 0.13 | 8.78±0.96  | 8.91±0.77 | -0.01 |
| 11HX-173 | 70.25±0.83   | 92.00±6.04   | 0.31 | 6.45±0.39  | 5.07±0.99 | 0.21  |
| 11HX-174 | 84.00±10.51  | 111.00±5.83  | 0.32 | 9.98±1.29  | 7.53±0.59 | 0.25  |
| 11HX-176 | 70.00±2.74   | 90.00±4.97   | 0.29 | 6.71±0.67  | 5.00±0.85 | 0.25  |
| 11HX-177 | 124.00±25.78 | 215.67±11.73 | 0.74 | 9.12±0.58  | 5.95±1.02 | 0.35  |
| 11HX-178 | 45.33±4.78   | 69.75±2.49   | 0.54 | 7.33±0.30  | 5.74±0.95 | 0.22  |
| 11HX-181 | 90.33±6.94   | 110.33±7.76  | 0.22 | 9.65±0.62  | 6.26±0.10 | 0.35  |
| 11HX-182 | 64.67±14.20  | 76.33±17.33  | 0.18 | 4.55±0.93  | 4.36±0.84 | 0.04  |
| 11HX-183 | 102.67±8.50  | 106.67±11.59 | 0.04 | 9.13±0.61  | 6.59±0.17 | 0.28  |
| 11HX-184 | NA           | 121.33±28.17 | NA   | NA         | 4.94±0.90 | NA    |
| 11HX-185 | 87.00±3.56   | 90.33±13.89  | 0.04 | 7.52±0.91  | 6.84±0.60 | 0.09  |
| 11HX-187 | 57.67±1.70   | 89.67±4.99   | 0.55 | 9.01±0.97  | 4.69±1.30 | 0.48  |
| 11HX-188 | 62.33±6.85   | 66.67±6.18   | 0.07 | 7.29±0.41  | 5.91±0.28 | 0.19  |
| 11HX-189 | 75.00±9.20   | 118.33±6.24  | 0.58 | 7.35±0.60  | 4.26±0.65 | 0.42  |
| 11HX-190 | 99.67±3.68   | 118.33±18.79 | 0.19 | 5.94±0.12  | 5.61±0.77 | 0.06  |
| 11HX-191 | 75.67±10.34  | 96.50±16.50  | 0.28 | 6.25±0.28  | 4.73±0.64 | 0.24  |
| 11HX-193 | 125.67±10.21 | 191.67±16.5  | 0.53 | 6.78±2.37  | 5.67±0.54 | 0.16  |
| 11HX-194 | 112.33±3.09  | 123.33±1.25  | 0.10 | 8.70±0.89  | 8.59±0.35 | 0.01  |
| 11HX-195 | 107.33±2.62  | 119.33±28.99 | 0.11 | 7.33±1.09  | 5.69±0.78 | 0.22  |
| 11HX-196 | 127.67±4.78  | 148.00±8.64  | 0.16 | 8.91±0.91  | 8.17±1.62 | 0.08  |
| 11HX-197 | 109.33±11.73 | 135.50±33.50 | 0.24 | 7.57±0.88  | 7.27±1.46 | 0.04  |
| 11HX-198 | 97.33±59.25  | 189.00±11.34 | 0.94 | 8.16±0.56  | 6.08±0.37 | 0.25  |
| 11HX-199 | 64.33±5.44   | 79.00±3.56   | 0.23 | 7.80±1.57  | 6.24±0.70 | 0.20  |
| 11HX-200 | 101.33±6.13  | 151.33±4.92  | 0.49 | 8.07±0.28  | 6.28±0.42 | 0.22  |
| 11HX-202 | 100.67±4.78  | 109.67±10.21 | 0.09 | 6.55±0.33  | 6.00±1.04 | 0.08  |
| 11HX-203 | 53.33±2.49   | 74.33±9.98   | 0.39 | 8.41±0.54  | 6.87±0.95 | 0.18  |
| 11HX-206 | 64.67±4.19   | NA           | NA   | 8.39±1.43  | NA        | NA    |
| 11HX-207 | 78.67±6.60   | NA           | NA   | 8.65±0.84  | NA        | NA    |
| 11HX-208 | 54.00±1.41   | NA           | NA   | 6.39±1.47  | NA        | NA    |
| 11HX-212 | 67.25±5.45   | NA           | NA   | 7.13±0.46  | NA        | NA    |
| 11HX-213 | 70.00±3.24   | 103.50±5.36  | 0.48 | 6.99±1.25  | 5.96±0.41 | 0.15  |
| 11HX-214 | 86.00±9.77   | NA           | NA   | 7.07±0.80  | NA        | NA    |
| 11HX-215 | 62.25±7.29   | 75.50±4.39   | 0.21 | 7.67±0.13  | 5.68±0.33 | 0.26  |
| 11HX-216 | 48.75±2.49   | 72.75±3.96   | 0.49 | 7.49±0.67  | 7.11±0.74 | 0.05  |
| 11HX-217 | 81.50±17.10  | 146.75±25.81 | 0.80 | 6.09±1.17  | 5.03±1.04 | 0.17  |
| 11HX-218 | 80.25±2.68   | 92.00±8.15   | 0.15 | 6.26±1.18  | 5.02±0.78 | 0.20  |
| 11HX-219 | 54.50±7.63   | 84.00±3.67   | 0.54 | 7.35±0.69  | 5.06±0.85 | 0.31  |
| 11HX-220 | 90.00±7.12   | 139.33±8.22  | 0.55 | 12.10±2.09 | 8.04±0.92 | 0.34  |
| 11HX-221 | 81.67±1.25   | 93.00±10.61  | 0.14 | 7.67±2.30  | 6.40±0.79 | 0.17  |

|          |              |              |      |            |             |      |
|----------|--------------|--------------|------|------------|-------------|------|
| 11HX-222 | 67.00±1.41   | 70.00±6.68   | 0.04 | 7.98±0.73  | 7.02±0.39   | 0.12 |
| 11HX-223 | 91.00±4.32   | 129.00±14.17 | 0.42 | 10.71±0.80 | 8.74±1.74   | 0.18 |
| 11HX-224 | 62.00±1.41   | 80.67±20.98  | 0.30 | 5.19±0.36  | 4.72±0.18   | 0.09 |
| 11HX-225 | 99.33±8.34   | 150.67±22.94 | 0.52 | 7.54±0.32  | 437.29±0.51 | 0.03 |
| 11HX-226 | 47.25±2.49   | 59.25±1.92   | 0.25 | 5.87±0.65  | 4.72±0.20   | 0.20 |
| 11HX-227 | 64.25±2.59   | 84.75±19.43  | 0.32 | 7.10±0.65  | 4.73±0.54   | 0.33 |
| 11HX-228 | 107.33±28.02 | 118.33±5.73  | 0.10 | 9.22±0.69  | 7.80±0.28   | 0.15 |
| 11HX-229 | 80.00±12.75  | 115.25±7.85  | 0.44 | 6.08±0.83  | 5.22±0.71   | 0.14 |
| 11HX-230 | 99.00±12.03  | 131.67±17.00 | 0.33 | 10.57±2.43 | 7.90±0.61   | 0.25 |
| 11HX-231 | 63.50±4.15   | 105.75±22.50 | 0.67 | 5.48±0.67  | 4.19±0.30   | 0.24 |
| 11HX-232 | 69.33±4.92   | 111.00±13.93 | 0.60 | 6.16±0.61  | 5.42±0.70   | 0.12 |
| 11HX-233 | 85.00±5.10   | 132.00±16.08 | 0.55 | 5.58±0.45  | 5.16±0.33   | 0.08 |
| 11HX-234 | 61.67±8.34   | 69.33±2.36   | 0.12 | 7.67±1.00  | 6.96±1.36   | 0.09 |
| 11HX-236 | 39.00±4.97   | 48.00±6.00   | 0.23 | 4.15±0.81  | 3.94±0.15   | 0.05 |

Plant height increase rate (PHCR) = (PHW - PHN) / PHN

Stem diameter reduction rate (SDCR) = (SDN - SDW) / SDN

These 185 accessions were derived from the Chinese mini-core soybean collection.

Y.H. Li, W. Li, C. Zhang, L. Yang, R.Z. Chang, B.S. Gaut, L.J. Qiu, Genetic diversity in domesticated soybean (*Glycine max*) and its wild progenitor (*Glycine soja*) for simple sequence repeat and single-nucleotide polymorphism loci, *New Phytol.* 188 (2010) 242 – 253.
