# Supplementary material
Source: MDPI journal article supplement (https://www.mdpi.com/2073-4395/12/7/1483)
Supplement: s1 [file s1]

Supplementary Table S3. Q value of each accession under K=4

| Serial Number | ID       | Q1    | Q2    | Q3    | Q4    |
|---------------|----------|-------|-------|-------|-------|
| 1             | 11HX-001 | 0.05  | 0.015 | 0.045 | 0.889 |
| 2             | 11HX-002 | 0.005 | 0.008 | 0.002 | 0.985 |
| 3             | 11HX-003 | 0.002 | 0.002 | 0.001 | 0.996 |
| 4             | 11HX-004 | 0.01  | 0.005 | 0.004 | 0.982 |
| 5             | 11HX-005 | 0.002 | 0.002 | 0.001 | 0.995 |
| 6             | 11HX-006 | 0.016 | 0.033 | 0.065 | 0.886 |
| 7             | 11HX-008 | 0.004 | 0.266 | 0.167 | 0.562 |
| 8             | 11HX-009 | 0.003 | 0.003 | 0.001 | 0.993 |
| 9             | 11HX-010 | 0.014 | 0.213 | 0.002 | 0.772 |
| 10            | 11HX-011 | 0.003 | 0.002 | 0.001 | 0.993 |
| 11            | 11HX-012 | 0.018 | 0.247 | 0.2   | 0.535 |
| 12            | 11HX-013 | 0.019 | 0.008 | 0.623 | 0.35  |
| 13            | 11HX-015 | 0.19  | 0.222 | 0.007 | 0.582 |
| 14            | 11HX-016 | 0.017 | 0.004 | 0.211 | 0.768 |
| 15            | 11HX-018 | 0.006 | 0.032 | 0.553 | 0.41  |
| 16            | 11HX-019 | 0.016 | 0.037 | 0.687 | 0.26  |
| 17            | 11HX-021 | 0.005 | 0.003 | 0.517 | 0.475 |
| 18            | 11HX-022 | 0.028 | 0.011 | 0.72  | 0.24  |
| 19            | 11HX-023 | 0.067 | 0.321 | 0.005 | 0.607 |
| 20            | 11HX-025 | 0.012 | 0.006 | 0.16  | 0.822 |
| 21            | 11HX-026 | 0.19  | 0.018 | 0.578 | 0.214 |
| 22            | 11HX-029 | 0.006 | 0.017 | 0.469 | 0.508 |
| 23            | 11HX-030 | 0.04  | 0.109 | 0.474 | 0.376 |
| 24            | 11HX-031 | 0.018 | 0.355 | 0.608 | 0.018 |
| 25            | 11HX-032 | 0.005 | 0.022 | 0.602 | 0.37  |
| 26            | 11HX-033 | 0.005 | 0.16  | 0.804 | 0.031 |
| 27            | 11HX-034 | 0.003 | 0.002 | 0.994 | 0.001 |
| 28            | 11HX-035 | 0.008 | 0.005 | 0.985 | 0.002 |
| 29            | 11HX-036 | 0.211 | 0.03  | 0.445 | 0.314 |
| 30            | 11HX-037 | 0.548 | 0.089 | 0.006 | 0.357 |
| 31            | 11HX-038 | 0.586 | 0.197 | 0.092 | 0.126 |
| 32            | 11HX-039 | 0.696 | 0.037 | 0.004 | 0.263 |
| 33            | 11HX-040 | 0.343 | 0.141 | 0.36  | 0.157 |
| 34            | 11HX-041 | 0.723 | 0.02  | 0.004 | 0.253 |
| 35            | 11HX-042 | 0.233 | 0.142 | 0.558 | 0.067 |
| 36            | 11HX-043 | 0.071 | 0.579 | 0.002 | 0.348 |
| 37            | 11HX-044 | 0.867 | 0.003 | 0.128 | 0.002 |
| 38            | 11HX-046 | 0.37  | 0.109 | 0.513 | 0.008 |
| 39            | 11HX-047 | 0.219 | 0.009 | 0.716 | 0.055 |

| <b>Serial<br/>Number</b> | <b>ID</b> | <b>Q1</b> | <b>Q2</b> | <b>Q3</b> | <b>Q4</b> |
|--------------------------|-----------|-----------|-----------|-----------|-----------|
| 40                       | 11HX-048  | 0.237     | 0.637     | 0.116     | 0.01      |
| 41                       | 11HX-049  | 0.939     | 0.011     | 0.048     | 0.001     |
| 42                       | 11HX-051  | 0.521     | 0.302     | 0.14      | 0.037     |
| 43                       | 11HX-052  | 0.991     | 0.003     | 0.005     | 0.001     |
| 44                       | 11HX-053  | 0.012     | 0.518     | 0.15      | 0.32      |
| 45                       | 11HX-054  | 0.374     | 0.297     | 0.25      | 0.079     |
| 46                       | 11HX-055  | 0.22      | 0.502     | 0.09      | 0.188     |
| 47                       | 11HX-056  | 0.114     | 0.389     | 0.171     | 0.326     |
| 48                       | 11HX-057  | 0.232     | 0.573     | 0.061     | 0.134     |
| 49                       | 11HX-061  | 0.6       | 0.007     | 0.366     | 0.026     |
| 50                       | 11HX-062  | 0.36      | 0.248     | 0.39      | 0.002     |
| 51                       | 11HX-063  | 0.56      | 0.434     | 0.003     | 0.003     |
| 52                       | 11HX-067  | 0.381     | 0.494     | 0.002     | 0.123     |
| 53                       | 11HX-068  | 0.33      | 0.646     | 0.001     | 0.022     |
| 54                       | 11HX-069  | 0.181     | 0.024     | 0.788     | 0.008     |
| 55                       | 11HX-071  | 0.166     | 0.765     | 0.053     | 0.017     |
| 56                       | 11HX-072  | 0.328     | 0.62      | 0.005     | 0.048     |
| 57                       | 11HX-074  | 0.054     | 0.907     | 0.027     | 0.012     |
| 58                       | 11HX-075  | 0.035     | 0.81      | 0.066     | 0.089     |
| 59                       | 11HX-076  | 0.265     | 0.611     | 0.041     | 0.082     |
| 60                       | 11HX-077  | 0.559     | 0.055     | 0.152     | 0.233     |
| 61                       | 11HX-078  | 0.118     | 0.248     | 0.13      | 0.504     |
| 62                       | 11HX-079  | 0.055     | 0.362     | 0.129     | 0.454     |
| 63                       | 11HX-080  | 0.079     | 0.504     | 0.189     | 0.228     |
| 64                       | 11HX-081  | 0.989     | 0.003     | 0.004     | 0.003     |
| 65                       | 11HX-082  | 0.012     | 0.963     | 0.008     | 0.017     |
| 66                       | 11HX-083  | 0.044     | 0.924     | 0.012     | 0.02      |
| 67                       | 11HX-085  | 0.005     | 0.755     | 0.015     | 0.225     |
| 68                       | 11HX-086  | 0.013     | 0.797     | 0.026     | 0.164     |
| 69                       | 11HX-087  | 0.007     | 0.984     | 0.003     | 0.005     |
| 70                       | 11HX-088  | 0.031     | 0.956     | 0.005     | 0.009     |
| 71                       | 11HX-090  | 0.003     | 0.774     | 0.003     | 0.219     |
| 72                       | 11HX-091  | 0.024     | 0.896     | 0.074     | 0.006     |
| 73                       | 11HX-093  | 0.006     | 0.988     | 0.003     | 0.003     |
| 74                       | 11HX-096  | 0.006     | 0.003     | 0.002     | 0.989     |
| 75                       | 11HX-097  | 0.731     | 0.002     | 0.001     | 0.265     |
| 76                       | 11HX-100  | 0.918     | 0.01      | 0.002     | 0.07      |
| 77                       | 11HX-101  | 0.733     | 0.002     | 0.084     | 0.181     |
| 78                       | 11HX-102  | 0.787     | 0.002     | 0.021     | 0.19      |
| 79                       | 11HX-105  | 0.42      | 0.001     | 0.577     | 0.001     |
| 80                       | 11HX-106  | 0.042     | 0.006     | 0.799     | 0.153     |

| <b>Serial<br/>Number</b> | <b>ID</b> | <b>Q1</b> | <b>Q2</b> | <b>Q3</b> | <b>Q4</b> |
|--------------------------|-----------|-----------|-----------|-----------|-----------|
| 81                       | 11HX-107  | 0.055     | 0.161     | 0.554     | 0.23      |
| 82                       | 11HX-108  | 0.002     | 0.004     | 0.001     | 0.993     |
| 83                       | 11HX-109  | 0.004     | 0.021     | 0.793     | 0.181     |
| 84                       | 11HX-110  | 0.024     | 0.185     | 0.426     | 0.366     |
| 85                       | 11HX-111  | 0.043     | 0.071     | 0.461     | 0.424     |
| 86                       | 11HX-112  | 0.081     | 0.007     | 0.358     | 0.553     |
| 87                       | 11HX-114  | 0.052     | 0.243     | 0.279     | 0.426     |
| 88                       | 11HX-115  | 0.205     | 0.001     | 0.793     | 0.001     |
| 89                       | 11HX-116  | 0.092     | 0.055     | 0.706     | 0.147     |
| 90                       | 11HX-118  | 0.003     | 0.13      | 0.269     | 0.597     |
| 91                       | 11HX-120  | 0.01      | 0.15      | 0.109     | 0.731     |
| 92                       | 11HX-121  | 0.041     | 0.012     | 0.455     | 0.492     |
| 93                       | 11HX-122  | 0.008     | 0.201     | 0.581     | 0.21      |
| 94                       | 11HX-123  | 0.016     | 0.18      | 0.646     | 0.158     |
| 95                       | 11HX-124  | 0.015     | 0.093     | 0.528     | 0.363     |
| 96                       | 11HX-125  | 0.003     | 0.001     | 0.995     | 0.001     |
| 97                       | 11HX-127  | 0.016     | 0.573     | 0.003     | 0.409     |
| 98                       | 11HX-128  | 0.001     | 0.001     | 0.997     | 0.001     |
| 99                       | 11HX-129  | 0.005     | 0.003     | 0.989     | 0.003     |
| 100                      | 11HX-130  | 0.006     | 0.087     | 0.65      | 0.258     |
| 101                      | 11HX-131  | 0.16      | 0.711     | 0.005     | 0.124     |
| 102                      | 11HX-132  | 0.034     | 0.817     | 0.033     | 0.115     |
| 103                      | 11HX-133  | 0.155     | 0.836     | 0.003     | 0.007     |
| 104                      | 11HX-134  | 0.01      | 0.701     | 0.049     | 0.24      |
| 105                      | 11HX-135  | 0.254     | 0.729     | 0.002     | 0.015     |
| 106                      | 11HX-136  | 0.011     | 0.201     | 0.353     | 0.436     |
| 107                      | 11HX-137  | 0.169     | 0.004     | 0.34      | 0.487     |
| 108                      | 11HX-138  | 0.225     | 0.685     | 0.087     | 0.003     |
| 109                      | 11HX-139  | 0.055     | 0.625     | 0.026     | 0.294     |
| 110                      | 11HX-142  | 0.079     | 0.902     | 0.016     | 0.003     |
| 111                      | 11HX-143  | 0.647     | 0.226     | 0.048     | 0.078     |
| 112                      | 11HX-144  | 0.155     | 0.46      | 0.15      | 0.235     |
| 113                      | 11HX-145  | 0.035     | 0.947     | 0.009     | 0.009     |
| 114                      | 11HX-147  | 0.147     | 0.746     | 0.093     | 0.014     |
| 115                      | 11HX-148  | 0.013     | 0.863     | 0.074     | 0.049     |
| 116                      | 11HX-149  | 0.088     | 0.903     | 0.002     | 0.007     |
| 117                      | 11HX-150  | 0.046     | 0.881     | 0.02      | 0.053     |
| 118                      | 11HX-151  | 0.007     | 0.988     | 0.001     | 0.003     |
| 119                      | 11HX-152  | 0.006     | 0.988     | 0.002     | 0.005     |
| 120                      | 11HX-153  | 0.016     | 0.796     | 0.007     | 0.181     |
| 121                      | 11HX-155  | 0.087     | 0.696     | 0.024     | 0.194     |

| <b>Serial<br/>Number</b> | <b>ID</b> | <b>Q1</b> | <b>Q2</b> | <b>Q3</b> | <b>Q4</b> |
|--------------------------|-----------|-----------|-----------|-----------|-----------|
| 122                      | 11HX-156  | 0.05      | 0.874     | 0.004     | 0.072     |
| 123                      | 11HX-159  | 0.008     | 0.987     | 0.002     | 0.002     |
| 124                      | 11HX-160  | 0.973     | 0.02      | 0.003     | 0.004     |
| 125                      | 11HX-161  | 0.018     | 0.882     | 0.005     | 0.094     |
| 126                      | 11HX-164  | 0.844     | 0.062     | 0.068     | 0.027     |
| 127                      | 11HX-165  | 0.094     | 0.844     | 0.015     | 0.047     |
| 128                      | 11HX-166  | 0.013     | 0.741     | 0.004     | 0.242     |
| 129                      | 11HX-167  | 0.874     | 0.018     | 0.106     | 0.002     |
| 130                      | 11HX-168  | 0.011     | 0.595     | 0.203     | 0.19      |
| 131                      | 11HX-170  | 0.004     | 0.789     | 0.008     | 0.199     |
| 132                      | 11HX-171  | 0.005     | 0.828     | 0.002     | 0.166     |
| 133                      | 11HX-172  | 0.002     | 0.59      | 0.001     | 0.406     |
| 134                      | 11HX-173  | 0.004     | 0.984     | 0.003     | 0.009     |
| 135                      | 11HX-174  | 0.078     | 0.909     | 0.006     | 0.008     |
| 136                      | 11HX-176  | 0.068     | 0.926     | 0.002     | 0.004     |
| 137                      | 11HX-177  | 0.007     | 0.955     | 0.023     | 0.015     |
| 138                      | 11HX-178  | 0.992     | 0.004     | 0.002     | 0.001     |
| 139                      | 11HX-181  | 0.266     | 0.673     | 0.006     | 0.055     |
| 140                      | 11HX-182  | 0.006     | 0.88      | 0.094     | 0.02      |
| 141                      | 11HX-183  | 0.002     | 0.643     | 0.353     | 0.002     |
| 142                      | 11HX-184  | 0.003     | 0.584     | 0.412     | 0.002     |
| 143                      | 11HX-185  | 0.004     | 0.938     | 0.003     | 0.055     |
| 144                      | 11HX-187  | 0.012     | 0.981     | 0.004     | 0.004     |
| 145                      | 11HX-188  | 0.004     | 0.537     | 0.107     | 0.352     |
| 146                      | 11HX-189  | 0.006     | 0.991     | 0.002     | 0.002     |
| 147                      | 11HX-190  | 0.009     | 0.971     | 0.006     | 0.014     |
| 148                      | 11HX-191  | 0.006     | 0.696     | 0.046     | 0.252     |
| 149                      | 11HX-193  | 0.106     | 0.813     | 0.002     | 0.078     |
| 150                      | 11HX-194  | 0.005     | 0.989     | 0.003     | 0.003     |
| 151                      | 11HX-195  | 0.004     | 0.984     | 0.005     | 0.008     |
| 152                      | 11HX-196  | 0.005     | 0.964     | 0.027     | 0.004     |
| 153                      | 11HX-197  | 0.007     | 0.937     | 0.022     | 0.034     |
| 154                      | 11HX-198  | 0.004     | 0.946     | 0.048     | 0.002     |
| 155                      | 11HX-199  | 0.059     | 0.934     | 0.003     | 0.005     |
| 156                      | 11HX-200  | 0.269     | 0.532     | 0.024     | 0.174     |
| 157                      | 11HX-202  | 0.005     | 0.442     | 0.222     | 0.331     |
| 158                      | 11HX-203  | 0.004     | 0.567     | 0.002     | 0.427     |
| 159                      | 11HX-206  | 0.054     | 0.005     | 0.022     | 0.92      |
| 160                      | 11HX-207  | 0.004     | 0.002     | 0.993     | 0.001     |
| 161                      | 11HX-208  | 0.004     | 0.011     | 0.377     | 0.607     |
| 162                      | 11HX-212  | 0.859     | 0.001     | 0.139     | 0.001     |

| <b>Serial<br/>Number</b> | <b>ID</b> | <b>Q1</b> | <b>Q2</b> | <b>Q3</b> | <b>Q4</b> |
|--------------------------|-----------|-----------|-----------|-----------|-----------|
| 163                      | 11HX-213  | 0.667     | 0.002     | 0.002     | 0.329     |
| 164                      | 11HX-214  | 0.03      | 0.009     | 0.713     | 0.247     |
| 165                      | 11HX-215  | 0.085     | 0.288     | 0.082     | 0.545     |
| 166                      | 11HX-216  | 0.133     | 0.32      | 0.03      | 0.517     |
| 167                      | 11HX-217  | 0.009     | 0.257     | 0.168     | 0.566     |
| 168                      | 11HX-218  | 0.003     | 0.017     | 0.095     | 0.886     |
| 169                      | 11HX-219  | 0.38      | 0.288     | 0.143     | 0.19      |
| 170                      | 11HX-220  | 0.006     | 0.982     | 0.008     | 0.003     |
| 171                      | 11HX-221  | 0.062     | 0.565     | 0.038     | 0.336     |
| 172                      | 11HX-222  | 0.986     | 0.005     | 0.007     | 0.003     |
| 173                      | 11HX-223  | 0.344     | 0.649     | 0.002     | 0.006     |
| 174                      | 11HX-224  | 0.007     | 0.49      | 0.001     | 0.502     |
| 175                      | 11HX-225  | 0.067     | 0.011     | 0.003     | 0.919     |
| 176                      | 11HX-226  | 0.499     | 0.465     | 0.009     | 0.028     |
| 177                      | 11HX-227  | 0.009     | 0.982     | 0.003     | 0.006     |
| 178                      | 11HX-228  | 0.296     | 0.696     | 0.004     | 0.003     |
| 179                      | 11HX-229  | 0.093     | 0.586     | 0.016     | 0.305     |
| 180                      | 11HX-230  | 0.29      | 0.698     | 0.005     | 0.008     |
| 181                      | 11HX-231  | 0.934     | 0.012     | 0.051     | 0.002     |
| 182                      | 11HX-232  | 0.016     | 0.944     | 0.03      | 0.01      |
| 183                      | 11HX-233  | 0.007     | 0.006     | 0.408     | 0.579     |
| 184                      | 11HX-234  | 0.007     | 0.843     | 0.003     | 0.147     |
| 185                      | 11HX-236  | 0.027     | 0.207     | 0.008     | 0.757     |
